# Supplementary material for: 1,8-Chalcogen-bridged naphthalenes. Strong carbon bases in the gas phase
Source: Royal Society of Chemistry journal article supplement (doi:10.1039/b205601a), 2002-01-01
Supplement: b205601a.doc [file b205601a.doc]

**SUPPLEMENTARY MATERIAL:**

**B3LYP/6-31G* optimized geometries of Chalcogen-bridged naphthalenes ( X = Y) and their protonated species (Cartesian coordinates in Å)**

**OO**

C -1.55073 0.00000 0.49019

C -1.51741 0.00000 1.96908

C -0.35801 0.00000 2.71303

C 0.87073 0.00000 2.04028

C 0.92392 0.00000 0.62230

C -0.25172 0.00000 -0.16954

H -2.49397 0.00000 2.44654

H -0.38793 0.00000 3.79903

H 1.80119 0.00000 2.60203

C 2.21796 0.00000 0.04006

C -0.12859 0.00000 -1.62127

C 1.25440 0.00000 -2.14622

C 2.37956 0.00000 -1.35143

H 3.08823 0.00000 0.69119

H 3.37468 0.00000 -1.78736

H 1.32983 0.00000 -3.23062

O -1.06072 0.00000 -2.43851

O -2.65838 0.00000 -0.06644

**OO'**

C 0.00000 2.38832 -0.33983

C 0.00000 2.42426 1.08591

C 0.00000 1.29942 1.89889

C 0.00000 0.00000 1.31412

C 0.00000 0.00000 -0.08668

C 0.00000 1.128847 -0.89976

C 0.00000 -1.29942 1.89889

C 0.00000 -2.42426 1.08591

C 0.00000 -2.38832 -0.33983

C 0.00000 -1.12884 -0.89976

H 0.00000 3.29742 -0.92898

H 0.00000 3.40379 1.55688

H 0.00000 1.41229 2.97906

H 0.00000 -1.41229 2.97906

H 0.00000 -3.40379 1.55688

H 0.00000 -3.29742 -0.92898

O 0.00000 0.74986 -2.22007

O 0.00000 -0.74986-2.22007

**OO*o***

C -1.55623 0.07989 0.48082

C -1.65618 -0.04673 1.96458

C -0.51906 -0.00456 2.73379

C 0.73458 0.02792 2.09324

C 0.91109 0.03037 0.66457

C -0.22286 -0.03016 -0.13403

H -2.65881 -0.02681 2.38250

H -0.56930 -0.01411 3.81816

H 1.63115 -0.00302 2.70965

C 2.25155 0.04475 0.10791

C -0.10199 -0.11238 -1.61562

C 1.31199 -0.23804 -2.18472

C 2.43650 -0.03397 -1.22749

H 3.09240 0.15544 0.78545

H 3.43737 0.04279 -1.64417

H 1.40776 0.39844 -3.07400

O -1.08063 -0.08332 -2.33408

O -2.57490 0.38499 -0.12797

H 1.36735 -1.26860 -2.57939

**OO*m***

C -1.57720 0.07678 0.42479

C -1.65439 -0.06654 1.89546

C -0.53827 -0.04672 2.71688

C 0.72651 -0.00837 2.13303

C 0.89714 -0.00310 0.70420

C -0.24247 0.02715 -0.16586

H -2.65986 -0.10685 2.30743

H -0.64184 -0.07870 3.79693

H 1.61421 -0.02014 2.76012

C 2.18551 -0.07210 0.20428

C -0.10598 0.01502 -1.61991

C 1.23021 -0.25394 -2.09981

C 2.42040 -0.19098 -1.24549

H 3.04506 -0.05918 0.86873

H 3.04781 -1.08372 -1.44838

H 1.35283 -0.38480 -3.17302

O -0.99535 0.27823 -2.43971

O -2.61824 0.25359 -0.21113

H 3.10171 0.61566 -1.59051

**OO*p***

C -1.56000 0.14801 0.45538

C -1.69792 -0.04315 1.92355

C -0.57353 -0.11284 2.70079

C 0.69873 -0.10688 2.07924

C 0.90281 -0.02365 0.66918

C -0.20376 0.00027 -0.14873

H -2.70341 0.02046 2.32920

H -0.63743 -0.17803 3.78249

H 1.57709 -0.22632 2.71175

C 2.29627 -0.07326 0.10734

C -0.09626 -0.09279 -1.64560

C 1.27186 -0.04740 -2.18385

C 2.35559 -0.05121 -1.38443

H 2.82251 -0.96722 0.48003

H 3.34903 -0.05692 -1.82621

H 1.35235 -0.02057 -3.26580

O -1.09886 -0.15192 -2.33682

O -2.52617 0.53619 -0.18327

H 2.87736 0.77188 0.51210

**OO*hb***

C -1.50962 0.00000 0.46849

C -1.58567 0.00000 1.94760

C -0.45311 0.00000 2.71388

C 0.82540 0.00000 2.08947

C 0.97889 0.00000 0.69006

C -0.18122 0.00000 -0.13635

H -2.58165 0.00000 2.38122

H -0.51416 0.00000 3.79747

H 1.71473 0.00000 2.71534

C 2.27090 0.00000 0.10858

C -0.03183 0.00000 -1.53066

C 1.28851 0.00000 -2.09611

C 2.41159 0.00000 -1.28701

H 3.14893 0.00000 0.74783

H 3.40026 0.00000 -1.73348

H 1.36961 0.00000 -3.17915

O -1.04398 0.00000 -2.37366

O -2.54698 0.00000 -0.21181

H -1.89311 0.00000 -1.85321

**OO*cc***

C -1.54279 0.00000 0.47833

C -1.58742 0.00000 1.96969

C -0.45489 0.00000 2.73315

C 0.80537 0.00000 2.08548

C 0.95332 0.00000 0.68188

C -0.20384 0.00000 -0.15665

H -2.58337 0.00000 2.40390

H -0.50191 0.00000 3.81744

H 1.70580 0.00000 2.69590

C 2.25899 0.00000 0.13380

C -0.01818 0.00000 -1.54681

C 1.30834 0.00000 -2.07370

C 2.42519 0.00000 -1.25124

H 3.12118 0.00000 0.79348

H 3.41843 0.00000 -1.68732

H 1.43717 0.00000 -3.15412

O -1.07952 0.00000 -2.35079

O -2.60086 0.00000 -0.13723

H -0.81871 0.00000 -3.28872

**SS**

C -1.02441 0.00000 0.78397

C -1.14763 0.00000 2.16048

C 0.02701 0.00000 2.94924

C 1.28368 0.00000 2.38028

C 1.43690 0.00000 0.96781

C 0.25380 0.00000 0.17095

H -2.12318 0.00000 2.63650

H -0.07414 0.00000 4.03114

H 2.17148 0.00000 3.00674

C 2.68822 0.00000 0.29495

C 0.34146 0.00000 -1.24395

C 1.57074 0.00000 -1.87549

C 2.74315 0.00000 -1.08343

H 3.60243 0.00000 0.88220

H 3.70771 0.00000 -1.58379

H 1.64521 0.00000 -2.95842

S -1.21560 0.00000 -2.10474

S -2.40733 0.00000 -0.33546

**SS'**

C 0.00000 2.45899 0.33736

C 0.00000 2.43456 1.72558

C 0.00000 1.20424 2.36459

C 0.00000 0.00000 1.621632

C 0.00000 0.00000 0.18169

C 0.00000 1.28522 -0.48300

C 0.00000 -1.20424 2.36459

C 0.00000 -2.43456 1.72558

C 0.00000 -2.45899 0.33736

C 0.00000 -1.28522 -0.48300

H 0.00000 3.40877 -0.18692

H 0.00000 3.35945 2.29408

H 0.00000 1.14609 3.45007

H 0.00000 -1.14609 3.45007

H 0.00000 -3.35945 2.29408

H 0.00000 -3.40877 -0.18692

S 0.00000 1.59143 -2.16465

S 0.00000 -1.59143 -2.16465

**SS*o***

C -1.09156 0.04367 0.76235

C -1.25996 0.10899 2.14561

C -0.11352 0.13752 2.94199

C 1.18569 0.10296 2.40433

C 1.38377 0.03771 1.03093

C 0.21687 0.00751 0.19407

H -2.24617 0.13710 2.59575

H -0.23311 0.18830 4.02019

H 2.04144 0.12752 3.07155

C 2.68669 -0.00179 0.39131

C 0.31611 -0.05780 -1.19401

C 1.64340 -0.10014 -1.89150

C 2.81265 -0.06515 -0.94623

H 3.56657 0.02147 1.02698

H 3.79489 -0.09371 -1.40834

H 1.71678 0.73837 -2.60207

S -1.15788 -0.08693 -2.06395

S -2.40614 -0.00047 -0.38703

H 1.70305 -1.00165 -2.52154

**SS*m***

C -1.07817 0.05551 0.72335

C -1.24418 0.07348 2.11246

C -0.12712 0.02747 2.97532

C 1.15471 -0.03636 2.47508

C 1.36186 -0.05629 1.05967

C 0.21436 -0.00859 0.17950

H -2.24138 0.12339 2.53982

H -0.29485 0.04321 4.04716

H 2.01392 -0.07182 3.13723

C 2.61535 -0.11927 0.48112

C 0.35125 -0.02547 -1.24924

C 1.58824 -0.08785 -1.82671

C 2.80081 -0.13895 -0.97564

H 3.50315 -0.15600 1.10841

H 3.41282 -1.02804 -1.22978

H 1.72012 -0.10187 -2.90357

S -1.16980 0.03961 -2.15002

S -2.41964 0.11075 -0.42407

H 3.49476 0.68321 -1.24329

**SS*p***

C -1.09956 0.03442 0.73763

C -1.28832 0.01057 2.12029

C -0.15770 -0.06207 2.93223

C 1.14553 -0.11118 2.40388

C 1.35273 -0.08861 1.03388

C 0.20960 -0.01460 0.19330

H -2.28065 0.04713 2.55660

H -0.28940 -0.08132 4.00985

H 1.99227 -0.16722 3.08174

C 2.71677 -0.13820 0.39310

C 0.33062 0.01327 -1.21461

C 1.60970 -0.03153 -1.86515

C 2.72553 -0.10258 -1.09958

H 3.25851 -1.04070 0.72101

H 3.69823 -0.13691 -1.58353

H 1.67026 -0.00834 -2.94806

S -1.13518 0.10348 -2.09546

S -2.40608 0.12397 -0.43020

H 3.34149 0.69136 0.76315

**SS*hb***

C -1.13553 0.00000 0.78698

C -1.15754 0.00000 2.23910

C -0.01944 0.00000 3.01132

C 1.22142 0.00000 2.36427

C 1.33034 0.00000 0.95731

C 0.15660 0.00000 0.11408

H -2.13673 0.00000 2.70699

H -0.08003 0.00000 4.09438

H 2.13485 0.00000 2.95336

C 2.63594 0.00000 0.41837

C 0.38786 0.00000 -1.29371

C 1.73175 0.00000 -1.78857

C 2.83729 0.00000 -0.96006

H 3.48438 0.00000 1.09644

H 3.83816 0.00000 -1.37801

H 1.87264 0.00000 -2.86598

S -0.77277 0.00000 -2.58729

S -2.67494 0.00000 0.09106

H -1.88207 0.00000 -1.76212

**SS*cc***

C -1.11139 0.00000 0.80510

C -1.14279 0.00000 2.25336

C 0.00204 0.00000 3.01977

C 1.24242 0.00000 2.36995

C 1.35479 0.00000 0.96130

C 0.17799 0.00000 0.13459

H -2.12243 0.00000 2.72050

H -0.05225 0.00000 4.10319

H 2.15577 0.00000 2.95957

C 2.64963 0.00000 0.39715

C 0.35669 0.00000 -1.27431

C 1.68258 0.00000 -1.79551

C 2.80775 0.00000 -0.98441

H 3.51592 0.00000 1.05204

H 3.79668 0.00000 -1.43026

H 1.82193 0.00000 -2.87228

S -0.97511 0.00000 -2.42070

S -2.59249 0.00000 0.02376

H -0.15230 0.00000 -3.50367

**SeSe**

C -0.49254 0.00000 1.16567

C -0.58987 0.00000 2.54340

C 0.58675 0.00000 3.32620

C 1.83087 0.00000 2.73576

C 1.96206 0.00000 1.32152

C 0.77440 0.00000 0.52159

H -1.55979 0.00000 3.03196

H 0.49656 0.00000 4.40900

H 2.73164 0.00000 3.34354

C 3.22329 0.00000 0.66842

C 0.89507 0.00000 -0.89453

C 2.13521 0.00000 -1.50254

C 3.30285 0.00000 -0.70640

H 4.12507 0.00000 1.27471

H 4.27236 0.00000 -1.19694

H 2.22341 0.00000 -2.58497

Se -0.72083 0.00000 -1.91505

Se -2.04558 0.00000 0.05176

**SeSe*o***

C -0.57427 0.05362 1.14459

C -0.71290 0.11004 2.53021

C 0.43691 0.12430 3.31974

C 1.72209 0.08379 2.75849

C 1.89664 0.02724 1.38152

C 0.72304 0.01103 0.54216

H -1.69257 0.14259 2.99526

H 0.33067 0.16830 4.39956

H 2.59199 0.09687 3.40755

C 3.20825 -0.01565 0.76125

C 0.85614 -0.04595 -0.84622

C 2.19588 -0.09185 -1.52064

C 3.35792 -0.07043 -0.57228

H 4.07519 -0.00196 1.41488

H 4.34523 -0.10224 -1.02312

H 2.28183 0.75002 -2.22599

Se -0.67080 -0.06487 -1.87521

Se -2.06001 0.03015 -0.00141

H 2.25691 -0.98983 -2.15594

**SeSe*m***

C -0.55560 0.03366 1.12274

C -0.69207 0.04985 2.51531

C 0.42775 0.00326 3.37025

C 1.69799 -0.05984 2.84642

C 1.88158 -0.07836 1.42795

C 0.72632 -0.03042 0.54726

H -1.68333 0.09940 2.95728

H 0.27347 0.01795 4.44405

H 2.57106 -0.09629 3.49025

C 3.14201 -0.14122 0.86698

C 0.89486 -0.04830 -0.88349

C 2.14104 -0.11055 -1.43690

C 3.34927 -0.16144 -0.58387

H 4.01827 -0.17755 1.51020

H 3.96175 -1.05079 -0.83381

H 2.28660 -0.12477 -2.51248

Se -0.68214 0.01849 -1.94556

Se -2.06933 0.09710 -0.02399

H 4.04313 0.66200 -0.84658

**SeSe*p***

C -0.58431 0.00078 1.12979

C -0.74403 -0.02444 2.51464

C 0.39066 -0.09549 3.31881

C 1.67963 -0.14192 2.76604

C 1.86327 -0.11835 1.39254

C 0.71389 -0.04555 0.55048

H -1.73024 0.01032 2.96591

H 0.27226 -0.11519 4.39789

H 2.54161 -0.19711 3.42471

C 3.23695 -0.16747 0.77399

C 0.86805 -0.01977 -0.85825

C 2.15905 -0.06459 -1.48232

C 3.27153 -0.13422 -0.71409

H 3.77312 -1.06810 1.11599

H 4.24813 -0.16828 -1.18978

H 2.23419 -0.04266 -2.56483

Se -0.65080 0.07397 -1.89553

Se -2.06450 0.09614 -0.03553

H 3.85306 0.66335 1.15616

**SeSe*hb***

C -0.61280 0.00000 1.14969

C -0.65251 0.00000 2.58506

C 0.48102 0.00000 3.37362

C 1.72386 0.00000 2.74357

C 1.83661 0.00000 1.33580

C 0.66739 0.00000 0.48502

H -1.63210 0.00000 3.05229

H 0.40342 0.00000 4.45549

H 2.63407 0.00000 3.33700

C 3.14330 0.00000 0.80033

C 0.91038 0.00000 -0.92724

C 2.25551 0.00000 -1.41066

C 3.35692 0.00000 -0.57525

H 3.98740 0.00000 1.48410

H 4.36115 0.00000 -0.98508

H 2.40276 0.00000 -2.48663

Se -0.32421 0.00000 -2.31735

Se -2.30132 0.00000 0.40699

H -1.54686 0.00000 -1.26475

**SeSe*cc***

C -0.50420 0.05543 1.16860

C -0.63968 0.17494 2.53201

C 0.52364 0.29206 3.33419

C 1.77876 0.28140 2.76928

C 1.94026 0.16683 1.36242

C 0.76801 0.06749 0.54971

H -1.61611 0.17246 3.00686

H 0.40848 0.38709 4.40901

H 2.66354 0.36416 3.39314

C 3.20944 0.14442 0.72326

C 0.94802 -0.01747 -0.84928

C 2.17701 -0.05401 -1.46397

C 3.32908 0.02926 -0.64572

H 4.10068 0.21400 1.34021

H 4.30833 0.00415 -1.11198

H 2.27880 -0.13561 -2.54166

Se -0.68677 -0.02388 -1.88756

Se -2.03568 -0.25021 0.02419

H -0.76223 1.47061 -2.02400

**TeTe**

C -0.06469 0.00000 1.49032

C -0.11685 0.00000 2.87369

C 1.06416 0.00000 3.64670

C 2.28991 0.00000 3.02680

C 2.39073 0.00000 1.61025

C 1.19292 0.00000 0.80349

H -1.07366 0.00000 3.38994

H 0.99163 0.00000 4.73084

H 3.20697 0.00000 3.61024

C 3.66552 0.00000 0.98442

C 1.35668 0.00000 -0.62008

C 2.61904 0.00000 -1.18832

C 3.77926 0.00000 -0.38446

H 4.55086 0.00000 1.61494

H 4.75665 0.00000 -0.85915

H 2.73784 0.00000 -2.26901

Te -0.37693 0.00000 -2.01826

Te -2.01212 0.00000 0.40914

**TeTe*o***

C -0.15039 0.06514 1.46219

C -0.23390 0.12640 2.85530

C 0.92296 0.14568 3.63393

C 2.18533 0.10425 3.03841

C 2.32521 0.04277 1.65585

C 1.13868 0.02090 0.80885

H -1.19902 0.15994 3.35264

H 0.83653 0.19350 4.71534

H 3.07622 0.12000 3.65868

C 3.65064 0.00109 1.06944

C 1.31365 -0.04153 -0.58563

C 2.68831 -0.08569 -1.21212

C 3.83741 -0.05845 -0.25678

H 4.49736 0.02002 1.74934

H 4.83437 -0.08916 -0.68646

H 2.79662 0.75222 -1.91965

Te -0.33999 -0.08110 -1.97090

Te -2.03856 0.04080 0.35854

H 2.77514 -0.98432 -1.84411

**TeTe*m***

C -0.13404 0.01634 1.46461

C -0.22157 0.03011 2.86625

C 0.90404 -0.01566 3.71083

C 2.15758 -0.07705 3.15648

C 2.30970 -0.09394 1.73313

C 1.13987 -0.04641 0.84878

H -1.20000 0.07831 3.33794

H 0.76779 -0.00191 4.78713

H 3.04812 -0.11361 3.77644

C 3.57997 -0.15599 1.19761

C 1.34812 -0.06598 -0.59212

C 2.61427 -0.12766 -1.10196

C 3.81828 -0.17696 -0.24523

H 4.44061 -0.19087 1.86162

H 4.43068 -1.06653 -0.49202

H 2.79060 -0.14323 -2.17406

Te -0.33654 0.00137 -2.04211

Te -2.04585 0.09609 0.33396

H 4.50943 0.64928 -0.50392

**TeTe*p***

C -0.16784 -0.03461 1.45665

C -0.27621 -0.07041 2.85043

C 0.86482 -0.15743 3.64276

C 2.13227 -0.21012 3.05596

C 2.28282 -0.17719 1.67753

C 1.12253 -0.08737 0.83111

H -1.24849 -0.03095 3.33338

H 0.76627 -0.18437 4.72374

H 3.01408 -0.27792 3.68727

C 3.67150 -0.23676 1.09192

C 1.31982 -0.05556 -0.58549

C 2.63690 -0.11119 -1.16318

C 3.74304 -0.19604 -0.38824

H 4.18686 -1.14515 1.44667

H 4.72637 -0.23688 -0.84926

H 2.74538 -0.08459 -2.24404

Te -0.30951 0.07715 -1.98490

Te -2.04533 0.10350 0.32310

H 4.28316 0.58586 1.49905

**TeTe*cc***

C -0.10487 0.10442 1.49416

C -0.22439 0.13481 2.87268

C 0.93284 0.23359 3.67576

C 2.17081 0.30131 3.08002

C 2.32308 0.25515 1.66853

C 1.15876 0.13249 0.82749

H -1.19548 0.09132 3.35798

H 0.83267 0.26083 4.75579

H 3.06544 0.38707 3.69037

C 3.61249 0.33040 1.07754

C 1.36619 0.05204 -0.58160

C 2.63566 0.13824 -1.12172

C 3.76749 0.28374 -0.28652

H 4.47592 0.43206 1.72847

H 4.75335 0.35142 -0.73515

H 2.79121 0.09217 -2.19646

Te -0.30440 -0.40386 -1.99142

Te -1.97392 0.10974 0.31761

H -2.07941 1.88235 0.19922

**B3LYP/6-31G* optimized geometries of Chalcogen-bridged naphthalenes ( X  Y) and their protonated species (Cartesian coordinates in Å)**

**OS**

C -1.16890 -0.00604 0.59905

C -1.32480 -0.01196 1.96994

C -0.14621 -0.01178 2.76366

C 1.12516 -0.00574 2.22015

C 1.30464 0.00088 0.80813

C 0.12252 0.00059 0.03108

H -2.30178 -0.01705 2.44191

H -0.25905 -0.01681 3.84462

H 1.99567 -0.00570 2.87028

C 2.52969 0.00746 0.08687

C 0.13833 0.00654 -1.37347

C 1.33012 0.01301 -2.06774

C 2.52200 0.01331 -1.29783

H 3.47135 0.00814 0.62854

H 3.46995 0.01829 -1.82940

H 1.35586 0.01741 -3.15133

O -1.10770 0.00469 -1.94930

S -2.34161 -0.00496 -0.72808

**OS*o***

C -1.22922 0.02618 0.57427

C -1.43069 0.09006 1.95113

C -0.28441 0.12791 2.75782

C 1.03211 0.10502 2.25392

C 1.25551 0.04148 0.88201

C 0.09336 0.00308 0.06418

H -2.41971 0.11021 2.39444

H -0.42217 0.17780 3.83408

H 1.86773 0.13742 2.94560

C 2.53688 0.00992 0.19232

C 0.13805 -0.06109 -1.31559

C 1.41295 -0.09565 -2.07529

C 2.60994 -0.05252 -1.15331

H 3.44383 0.03796 0.78831

H 3.57747 -0.07505 -1.64535

H 1.44250 0.74429 -2.78788

O -1.03931 -0.08929 -1.91178

S -2.33908 -0.03671 -0.76973

H 1.44324 -0.99721 -2.70795

**OS*o'***

C -1.27567 0.03512 0.62807

C -1.52843 0.10120 1.99232

C -0.39711 0.13569 2.81552

C 0.93347 0.10714 2.33504

C 1.19112 0.04111 0.97218

C 0.04397 0.00576 0.12579

H -2.53519 0.12446 2.39147

H -0.55149 0.18751 3.88935

H 1.75291 0.13752 3.04597

C 2.48464 0.00390 0.31100

C 0.09276 -0.05997 -1.25702

C 1.40149 -0.09945 -1.97854

C 2.58017 -0.06036 -1.03255

H 3.38121 0.02868 0.92259

H 3.55551 -0.08762 -1.50916

H 1.46642 0.73976 -2.68888

S -1.49737 -0.08315 -1.88278

O -2.21610 -0.00740 -0.34875

H 1.45882 -1.00156 -2.60781

**OS*m***

C -1.20344 0.00829 0.57048

C -1.36557 0.01703 1.95340

C -0.21867 0.01861 2.79120

C 1.06420 0.01087 2.28485

C 1.25906 0.00086 0.86631

C 0.09046 -0.00000 0.03583

H -2.35280 0.02405 2.40467

H -0.37073 0.02609 3.86568

H 1.92464 0.01197 2.94595

C 2.47484 -0.00752 0.20394

C 0.11903 -0.00910 -1.38424

C 1.30320 -0.01690 -2.06306

C 2.55792 -0.01686 -1.26790

H 3.40806 -0.00759 0.76250

H 3.19440 -0.87661 -1.56023

H 1.35333 -0.02364 -3.14562

O -1.11439 -0.00894 -1.95032

S -2.37060 0.00326 -0.75275

H 3.20175 0.83344 -1.57128

**OS*m’***

C -1.26629 0.06516 0.58171

C -1.50796 0.08843 1.95420

C -0.40496 0.04374 2.84446

C 0.90123 -0.02206 2.40003

C 1.16387 -0.04666 0.99240

C 0.03938 -0.00095 0.10325

H -2.52363 0.13988 2.33242

H -0.60757 0.06250 3.91029

H 1.72795 -0.05527 3.10207

C 2.40851 -0.11103 0.39394

C 0.12912 -0.01760 -1.32057

C 1.34845 -0.08085 -1.92706

C 2.56855 -0.13107 -1.07279

H 3.31105 -0.14871 1.00020

H 3.18103 -1.01878 -1.32971

H 1.47697 -0.09640 -3.00380

S -1.51819 0.05518 -1.96080

O -2.22688 0.10250 -0.37404

H 3.26095 0.69141 -1.34376

**OS*p***

C -1.23443 0.04690 0.54867

C -1.45245 0.02306 1.92484

C -0.32201 -0.05313 2.74675

C 0.99663 -0.10549 2.25056

C 1.22536 -0.08239 0.88140

C 0.08712 -0.00574 0.05741

H -2.44678 0.06113 2.35553

H -0.47087 -0.07281 3.82228

H 1.82483 -0.16377 2.95028

C 2.56374 -0.13076 0.18680

C 0.14976 0.02636 -1.34306

C 1.38465 -0.01637 -2.05969

C 2.51673 -0.09078 -1.31298

H 3.11977 -1.03407 0.48652

H 3.47752 -0.12529 -1.82045

H 1.39274 0.01044 -3.14323

O -1.02587 0.09918 -1.94036

S -2.33661 0.13521 -0.80890

H 3.20492 0.69751 0.53003

**OS*p’***

C -1.28319 0.04773 0.60057

C -1.55365 0.02579 1.96327

C -0.43850 -0.05099 2.80220

C 0.89466 -0.10456 2.33140

C 1.15986 -0.08242 0.97141

C 0.03626 -0.00498 0.12119

H -2.56527 0.06568 2.34912

H -0.60539 -0.07057 3.87500

H 1.70500 -0.16318 3.05179

C 2.51215 -0.13184 0.30641

C 0.10699 0.02792 -1.28125

C 1.36874 -0.01669 -1.96021

C 2.48814 -0.09179 -1.19331

H 3.06380 -1.03516 0.61460

H 3.45618 -0.12668 -1.68703

H 1.42519 0.00861 -3.04283

S -1.47778 0.12259 -1.91667

O -2.21660 0.11937 -0.39042

H 3.14905 0.69588 0.65944

**OS*hb***

C -1.21821 0.00000 0.54113

C -1.25607 0.00000 1.99471

C -0.11459 0.00000 2.76068

C 1.13796 0.00000 2.11920

C 1.25692 0.00000 0.71558

C 0.07683 0.00000 -0.10429

H -2.23684 0.00000 2.46029

H -0.17338 0.00000 3.84396

H 2.04468 0.00000 2.71903

C 2.55043 0.00000 0.14351

C 0.26897 0.00000 -1.51098

C 1.59250 0.00000 -2.05679

C 2.71127 0.00000 -1.24649

H 3.41878 0.00000 0.79557

H 3.70359 0.00000 -1.68462

H 1.67400 0.00000 -3.13944

O -0.69534 0.00000 -2.40739

S -2.70713 0.00000 -0.24447

H -1.59023 0.00000 -1.96160

**OS*cc***

C -1.36316 0.00000 0.74461

C -1.43119 0.00000 2.22213

C -0.29726 0.00000 2.98931

C 0.96961 0.00000 2.35553

C 1.11886 0.00000 0.95143

C -0.03700 0.00000 0.11606

H -2.42711 0.00000 2.65581

H -0.35312 0.00000 4.07313

H 1.86521 0.00000 2.97248

C 2.41435 0.00000 0.38326

C 0.10628 0.00000 -1.27999

C 1.43280 0.00000 -1.81562

C 2.55951 0.00000 -1.00447

H 3.28710 0.00000 1.02992

H 3.54653 0.00000 -1.45460

H 1.56522 0.00000 -2.89394

S -1.28622 0.00000 -2.34291

O -2.39957 0.00000 0.07595

H -0.54451 0.00000 -3.47723

**OSe**

C -0.75034 -0.00323 0.76118

C -0.88572 -0.01126 2.13107

C 0.29789 -0.01834 2.91544

C 1.55754 -0.01764 2.35002

C 1.71680 -0.00950 0.93566

C 0.52862 -0.00230 0.16046

H -1.85682 -0.01223 2.61549

H 0.19860 -0.02468 3.99768

H 2.44089 -0.02330 2.98279

C 2.94786 -0.00778 0.22749

C 0.56170 0.00628 -1.25008

C 1.76571 0.00739 -1.92637

C 2.95401 0.00038 -1.15586

H 3.88227 -0.01317 0.78166

H 3.90506 0.00130 -1.68193

H 1.79457 0.01368 -3.01015

O -0.65061 0.01289 -1.88015

Se -2.03895 0.00857 -0.63348

**OSe*o***

C -0.81444 0.03789 0.74304

C -0.99032 0.10351 2.11927

C 0.16320 0.13718 2.91618

C 1.46569 0.10781 2.38863

C 1.66483 0.04201 1.01147

C 0.49591 0.00755 0.19927

H -1.97217 0.12861 2.57831

H 0.04007 0.18859 3.99411

H 2.31685 0.13675 3.06128

C 2.95152 0.00561 0.33400

C 0.55686 -0.05828 -1.18840

C 1.84541 -0.09745 -1.92989

C 3.03847 -0.05793 -1.00918

H 3.85079 0.03108 0.94179

H 4.00883 -0.08437 -1.49540

H 1.87881 0.74047 -2.64481

O -0.58453 -0.08463 -1.83158

Se -2.04657 -0.02449 -0.66841

H 1.87350 -0.99880 -2.56315

**OSe*o’***

C -1.01631 0.05346 0.97067

C -1.24491 0.12130 2.34111

C -0.11277 0.15392 3.15912

C 1.21121 0.12166 2.66525

C 1.45425 0.05394 1.30138

C 0.30442 0.01983 0.44839

H -2.24972 0.14722 2.74537

H -0.26003 0.20699 4.23391

H 2.04018 0.15036 3.36515

C 2.75578 0.01448 0.65864

C 0.38695 -0.04767 -0.93180

C 1.70336 -0.08966 -1.63286

C 2.87368 -0.05114 -0.68195

H 3.64093 0.03915 1.28677

H 3.85436 -0.07998 -1.14722

H 1.77570 0.74763 -2.34531

Se -1.30868 -0.07175 -1.64844

O -1.99566 0.01498 0.04775

H 1.76499 -0.99243 -2.26140

**OSe*m***

C -0.80360 0.04290 0.71440

C -0.98070 0.06277 2.09260

C 0.14734 0.01793 2.95218

C 1.43165 -0.04560 2.45861

C 1.64470 -0.06723 1.04262

C 0.49298 -0.02082 0.18345

H -1.97311 0.11240 2.52990

H -0.01940 0.03465 4.02432

H 2.28616 -0.07949 3.12667

C 2.88211 -0.12967 0.42624

C 0.57656 -0.03639 -1.24158

C 1.79005 -0.09805 -1.86827

C 3.01712 -0.14850 -1.03881

H 3.79135 -0.16693 1.02162

H 3.62527 -1.03547 -1.30915

H 1.87353 -0.11057 -2.94894

O -0.60344 0.01285 -1.89283

Se -2.04856 0.08840 -0.71491

H 3.70554 0.67292 -1.32374

**OSe*m’***

C -1.00162 0.05516 0.93487

C -1.22133 0.07530 2.31438

C -0.11938 0.02925 3.20135

C 1.18076 -0.03591 2.74315

C 1.42862 -0.05823 1.33329

C 0.30305 -0.01114 0.43883

H -2.23597 0.12660 2.69596

H -0.31564 0.04637 4.26835

H 2.01689 -0.07077 3.43398

C 2.68095 -0.12224 0.75380

C 0.42849 -0.02807 -0.98591

C 1.65403 -0.09061 -1.57110

C 2.86702 -0.14186 -0.70826

H 3.57140 -0.16015 1.37778

H 3.48080 -1.03066 -0.95732

H 1.79739 -0.10529 -2.64616

Se -1.32568 0.05039 -1.71124

O -2.00089 0.09619 0.03162

H 3.56176 0.68131 -0.97001

**OSe*p***

C -0.82032 0.02278 0.72423

C -1.01354 -0.00066 2.10033

C 0.12438 -0.07422 2.91211

C 1.42965 -0.12505 2.39195

C 1.63480 -0.10298 1.01771

C 0.48992 -0.02837 0.19898

H -2.00116 0.03674 2.54649

H -0.00959 -0.09301 3.98958

H 2.27320 -0.18180 3.07332

C 2.97861 -0.15215 0.33544

C 0.56829 0.00073 -1.20959

C 1.81599 -0.04401 -1.90832

C 2.94581 -0.11605 -1.16150

H 3.53070 -1.05463 0.64512

H 3.90885 -0.15119 -1.66457

H 1.82658 -0.01953 -2.99205

O -0.57234 0.07117 -1.85307

Se -2.04370 0.11578 -0.70195

H 3.61447 0.67747 0.68503

**OSe*p’***

C -1.02729 0.02665 0.94782

C -1.27563 0.00423 2.31692

C -0.16024 -0.07202 3.15133

C 1.16673 -0.12543 2.66747

C 1.41798 -0.10350 1.30655

C 0.29290 -0.02607 0.44927

H -2.28580 0.04436 2.70688

H -0.32042 -0.09121 4.22518

H 1.98651 -0.18391 3.37721

C 2.77986 -0.15493 0.66128

C 0.39781 0.00448 -0.95118

C 1.66746 -0.04146 -1.60854

C 2.78143 -0.11624 -0.83529

H 3.32451 -1.05895 0.98040

H 3.75466 -0.15174 -1.31852

H 1.73762 -0.01706 -2.69051

Se -1.28973 0.10654 -1.67709

O -2.00048 0.09876 0.01010

H 3.41172 0.67184 1.02572

**OSe*hb***

C -0.72668 0.00000 0.60245

C -0.76374 0.00000 2.04639

C 0.38021 0.00000 2.81398

C 1.62769 0.00000 2.17094

C 1.74202 0.00000 0.76618

C 0.55741 0.00000 -0.05055

H -1.74176 0.00000 2.51738

H 0.32045 0.00000 3.89711

H 2.53708 0.00000 2.76657

C 3.03471 0.00000 0.19353

C 0.75472 0.00000 -1.46095

C 2.07648 0.00000 -2.00486

C 3.19609 0.00000 -1.19522

H 3.90243 0.00000 0.84634

H 4.18821 0.00000 -1.63384

H 2.15727 0.00000 -3.08739

O -0.20241 0.00000 -2.36642

Se -2.35020 0.00000 -0.22713

H -1.11099 0.00000 -1.94388

**OSe*cc***

C -1.09866 0.00000 1.13287

C -1.18653 0.00000 2.60040

C -0.05523 0.00000 3.37793

C 1.21958 0.00000 2.76404

C 1.37848 0.00000 1.35993

C 0.22671 0.00000 0.52391

H -2.18388 0.00000 3.03029

H -0.12579 0.00000 4.46087

H 2.10825 0.00000 3.39053

C 2.66861 0.00000 0.78080

C 0.35979 0.00000 -0.86921

C 1.67637 0.00000 -1.41777

C 2.80663 0.00000 -0.60898

H 3.54678 0.00000 1.42034

H 3.79258 0.00000 -1.06153

H 1.80259 0.00000 -2.49628

Se -1.16557 0.00000 -1.96498

O -2.11950 0.00000 0.42704

H -0.32990 0.00000 -3.21466

**OTe**

C -0.37887 0.00000 0.95004

C -0.47170 0.00000 2.32548

C 0.72069 0.00000 3.09375

C 1.96201 0.00000 2.49424

C 2.09061 0.00000 1.07740

C 0.88982 0.00000 0.30382

H -1.43233 0.00000 2.83234

H 0.64423 0.00000 4.17796

H 2.86322 0.00000 3.10199

C 3.33218 0.00000 0.38926

C 0.95413 0.00000 -1.11858

C 2.17789 0.00000 -1.76431

C 3.36111 0.00000 -0.99148

H 4.25526 0.00000 0.96250

H 4.31733 0.00000 -1.50820

H 2.21382 0.00000 -2.84834

O -0.20953 0.00000 -1.83168

Te -1.90409 0.00000 -0.62736

**OTe*o***

C -0.44080 0.04523 0.93280

C -0.56764 0.10964 2.31626

C 0.59728 0.13877 3.09736

C 1.87879 0.10546 2.53452

C 2.04283 0.04092 1.15008

C 0.86023 0.01083 0.34649

H -1.53745 0.13769 2.80184

H 0.49764 0.18906 4.17785

H 2.75104 0.13010 3.18012

C 3.33912 0.00336 0.49168

C 0.95241 -0.05410 -1.05577

C 2.26283 -0.09488 -1.76705

C 3.44965 -0.05885 -0.84791

H 4.22598 0.02722 1.11785

H 4.42606 -0.08600 -1.32196

H 2.30035 0.74139 -2.48395

O -0.13701 -0.08041 -1.77116

Te -1.92512 -0.01883 -0.65560

H 2.29036 -0.99524 -2.40216

**OTe*o’***

C -0.75602 0.06812 1.29004

C -0.94307 0.13512 2.67038

C 0.19088 0.16204 3.47947

C 1.50298 0.12441 2.96114

C 1.72289 0.05761 1.59499

C 0.56678 0.02818 0.72666

H -1.94443 0.16444 3.08377

H 0.05823 0.21424 4.55623

H 2.34707 0.14816 3.64311

C 3.03693 0.01549 0.98280

C 0.69131 -0.03774 -0.65599

C 2.03471 -0.08170 -1.31388

C 3.19073 -0.04847 -0.35277

H 3.90373 0.03735 1.63655

H 4.18205 -0.07888 -0.79534

H 2.12756 0.75425 -2.02630

Te -1.26606 -0.05969 -1.53922

O -1.79727 0.03852 0.44874

H 2.11045 -0.98204 -1.94545

**OTe*m***

C -0.40702 0.00659 0.92621

C -0.49995 0.01611 2.31564

C 0.66283 0.02051 3.12672

C 1.91669 0.01555 2.56319

C 2.05868 0.00581 1.13733

C 0.86630 0.00137 0.31686

H -1.46955 0.02031 2.80536

H 0.54888 0.02789 4.20593

H 2.80835 0.01894 3.18231

C 3.28741 0.00086 0.50335

C 0.93842 -0.00816 -1.12372

C 2.15498 -0.01325 -1.75418

C 3.40169 -0.01061 -0.96043

H 4.20414 0.00428 1.08809

H 4.03804 -0.87334 -1.24428

H 2.21411 -0.02014 -2.83684

O -0.21239 -0.01145 -1.81549

Te -1.94179 -0.00257 -0.64849

H 4.04802 0.83839 -1.26089

**OTe*m’***

C -0.73608 0.04352 1.26094

C -0.91825 0.06137 2.65110

C 0.18434 0.01400 3.53190

C 1.47408 -0.05123 3.05154

C 1.69801 -0.07110 1.63700

C 0.56793 -0.02258 0.73212

H -1.93058 0.11248 3.03964

H -0.00028 0.02976 4.60098

H 2.32456 -0.08776 3.72479

C 2.96009 -0.13512 1.08429

C 0.73461 -0.03956 -0.70030

C 1.97959 -0.10332 -1.24519

C 3.18363 -0.15544 -0.37045

H 3.83389 -0.17278 1.73158

H 3.79981 -1.04507 -0.60915

H 2.14857 -0.11884 -2.31724

Te -1.27849 0.05108 -1.59286

O -1.79288 0.08923 0.43508

H 3.88084 0.66892 -0.62020

**OTe*p***

C -0.44989 -0.01298 0.91704

C -0.59769 -0.06291 2.30024

C 0.54936 -0.16172 3.09649

C 1.83492 -0.21157 2.54206

C 2.00846 -0.16342 1.16214

C 0.85278 -0.06325 0.35065

H -1.57448 -0.02717 2.77162

H 0.43671 -0.20051 4.17597

H 2.69822 -0.28826 3.19671

C 3.36325 -0.21320 0.50360

C 0.96583 -0.00971 -1.07154

C 2.23620 -0.05393 -1.73686

C 3.35975 -0.14962 -0.98770

H 3.89862 -1.12671 0.81045

H 4.32822 -0.18372 -1.48023

H 2.25643 -0.00901 -2.82010

O -0.12312 0.08245 -1.78563

Te -1.91913 0.13819 -0.68673

H 3.99825 0.60363 0.88413

**OTe*p’***

C -0.77044 -0.00332 1.27187

C -0.97723 -0.03295 2.65171

C 0.14197 -0.10014 3.47511

C 1.45780 -0.13875 2.96500

C 1.68479 -0.11105 1.60190

C 0.55188 -0.04168 0.73385

H -1.98417 -0.00376 3.05174

H -0.00196 -0.12352 4.55123

H 2.29379 -0.19102 3.65647

C 3.06043 -0.14974 0.98590

C 0.69760 -0.00963 -0.67014

C 1.99065 -0.04516 -1.28832

C 3.09746 -0.11107 -0.50538

H 3.60489 -1.04814 1.32146

H 4.07919 -0.13814 -0.97191

H 2.08540 -0.01977 -2.36903

Te -1.24795 0.09251 -1.56275

O -1.80844 0.06144 0.41576

H 3.67432 0.68308 1.36773

**OTe*hb***

C -0.91249 0.00211 1.64348

C -0.96688 -0.01115 3.06529

C 0.17807 -0.04251 3.84059

C 1.42295 -0.06170 3.21158

C 1.51830 -0.04938 1.80117

C 0.34441 -0.01676 0.95934

H -1.95520 0.00462 3.51327

H 0.10570 -0.05198 4.92288

H 2.33519 -0.08639 3.79992

C 2.80570 -0.06993 1.22287

C 0.53413 -0.00618 -0.46957

C 1.87478 -0.02848 -0.98189

C 2.98921 -0.05967 -0.15968

H 3.66961 -0.09434 1.88189

H 3.98698 -0.07581 -0.58529

H 2.01575 -0.02047 -2.05809

Te -0.96018 0.04011 -2.01886

O -2.10974 0.03239 1.07776

H -2.07972 0.04178 0.08485

**OTe*cc***

C -0.38365 -0.00585 0.96326

C -0.51469 0.02298 2.33670

C 0.66250 0.14697 3.11349

C 1.90847 0.22730 2.51864

C 2.06485 0.17797 1.10803

C 0.88255 0.05794 0.31781

H -1.47979 -0.03588 2.82966

H 0.57415 0.17852 4.19460

H 2.79504 0.32179 3.13923

C 3.31327 0.22708 0.43052

C 0.98224 -0.03608 -1.08736

C 2.19371 -0.00185 -1.73148

C 3.36677 0.14338 -0.94519

H 4.22545 0.32507 1.01114

H 4.32581 0.18118 -1.45174

H 2.24811 -0.08529 -2.81125

O -0.21107 -0.20945 -1.81003

Te -1.84164 -0.12693 -0.64899

H -2.09109 1.63129 -0.83055

**SSe**

C -0.62530 0.00000 0.87396

C -0.73251 0.00000 2.24966

C 0.44564 0.00000 3.03236

C 1.69346 0.00000 2.44783

C 1.83255 0.00000 1.03364

C 0.64376 0.00000 0.23950

H -1.70280 0.00000 2.73689

H 0.35423 0.00000 4.11509

H 2.58972 0.00000 3.06227

C 3.08717 0.00000 0.36865

C 0.74325 0.00000 -1.17784

C 1.97896 0.00000 -1.79908

C 3.15027 0.00000 -1.00835

H 3.99682 0.00000 0.96300

H 4.11620 0.00000 -1.50603

H 2.05601 0.00000 -2.88207

S -0.77462 0.00000 -2.11068

Se -2.12705 0.00000 -0.30236

**SSe*o***

C -0.69727 0.04537 0.85965

C -0.84480 0.11053 2.24297

C 0.30665 0.13774 3.03232

C 1.59531 0.10175 2.47698

C 1.77579 0.03673 1.10025

C 0.60207 0.00769 0.26839

H -1.82489 0.13984 2.70685

H 0.19773 0.18846 4.11160

H 2.46183 0.12497 3.13020

C 3.08192 -0.00296 0.46833

C 0.71437 -0.05765 -1.12277

C 2.04926 -0.10013 -1.81076

C 3.21670 -0.06596 -0.86725

H 3.95650 0.01991 1.11138

H 4.20054 -0.09505 -1.32591

H 2.12467 0.73817 -2.52139

S -0.71868 -0.08955 -2.05787

Se -2.13318 0.00115 -0.34512

H 2.11047 -1.00126 -2.44126

**SSe*o’***

C -0.89184 0.05890 1.10280

C -1.04774 0.12470 2.48833

C 0.09788 0.15208 3.28377

C 1.39225 0.11580 2.73830

C 1.58226 0.05027 1.36441

C 0.41487 0.02088 0.52085

H -2.03294 0.15404 2.94132

H -0.01830 0.20321 4.36229

H 2.25310 0.13927 3.39902

C 2.89149 0.00990 0.73837

C 0.53707 -0.04465 -0.86503

C 1.87115 -0.08733 -1.54632

C 3.03453 -0.05350 -0.59656

H 3.76284 0.03249 1.38584

H 4.02068 -0.08316 -1.05001

H 1.95090 0.75130 -2.25628

Se -1.02980 -0.07658 -1.82993

S -2.25942 0.01955 0.01491

H 1.93614 -0.98853 -2.17662

**SSe*m***

C -0.68186 0.03820 0.82843

C -0.82854 0.05567 2.21800

C 0.29317 0.00977 3.07340

C 1.56679 -0.05372 2.55624

C 1.75798 -0.07348 1.13844

C 0.60251 -0.02615 0.26288

H -1.82025 0.10539 2.65844

H 0.13635 0.02531 4.14686

H 2.43553 -0.08939 3.20590

C 3.01350 -0.13654 0.56546

C 0.75015 -0.04398 -1.16899

C 1.99262 -0.10633 -1.73655

C 3.20452 -0.15649 -0.88877

H 3.89760 -0.17308 1.19787

H 3.81704 -1.04461 -1.14387

H 2.12604 -0.12074 -2.81347

S -0.72933 0.01770 -2.13955

Se -2.14250 0.09722 -0.38098

H 3.89699 0.66669 -1.15685

**SSe*m’***

C -0.87406 0.04906 1.07557

C -1.02660 0.06624 2.46840

C 0.08874 0.01950 3.33030

C 1.36611 -0.04463 2.82130

C 1.56344 -0.06402 1.40478

C 0.41579 -0.01597 0.51905

H -2.02295 0.11635 2.89837

H -0.07524 0.03483 4.40267

H 2.23103 -0.08096 3.47603

C 2.82202 -0.12773 0.83928

C 0.57589 -0.03373 -0.90936

C 1.81756 -0.09646 -1.47043

C 3.02573 -0.14723 -0.61404

H 3.70159 -0.16503 1.47816

H 3.64040 -1.03533 -0.86325

H 1.96257 -0.11099 -2.54586

Se -1.04380 0.03581 -1.90162

S -2.26973 0.10726 -0.00661

H 3.71974 0.67705 -0.87436

**SS*ep***

C -0.70579 0.01351 0.84173

C -0.87475 -0.01084 2.22480

C 0.26074 -0.08281 3.02989

C 1.55398 -0.13071 2.48422

C 1.74434 -0.10765 1.11102

C 0.59497 -0.03427 0.27500

H -1.86150 0.02489 2.67432

H 0.13942 -0.10229 4.10868

H 2.41137 -0.18638 3.14867

C 3.11210 -0.15703 0.47911

C 0.72946 -0.00764 -1.13623

C 2.01558 -0.05312 -1.77558

C 3.13086 -0.12328 -1.01107

H 3.65104 -1.05858 0.81409

H 4.10473 -0.15784 -1.49247

H 2.07857 -0.03087 -2.85864

S -0.69528 0.08121 -2.08286

Se -2.13236 0.10885 -0.38413

H 3.73219 0.67371 0.85433

**SSe*p’***

C -0.90232 0.01662 1.08289

C -1.07865 -0.00764 2.46803

C 0.05152 -0.07937 3.27848

C 1.34954 -0.12735 2.74143

C 1.54810 -0.10449 1.37072

C 0.40470 -0.03118 0.52404

H -2.06999 0.02831 2.90733

H -0.07629 -0.09866 4.35653

H 2.20208 -0.18287 3.41214

C 2.91905 -0.15396 0.74492

C 0.54787 -0.00464 -0.88240

C 1.83355 -0.04959 -1.51533

C 2.94587 -0.11970 -0.74526

H 3.45701 -1.05577 1.08119

H 3.92204 -0.15393 -1.22204

H 1.90711 -0.02737 -2.59776

Se -1.01079 0.09076 -1.85589

S -2.26433 0.10601 -0.02281

H 3.53879 0.67592 1.12282

**SSe*hb***

C -0.68041 0.00000 0.78753

C -0.70232 0.00000 2.22992

C 0.43766 0.00000 3.00511

C 1.67443 0.00000 2.35852

C 1.77915 0.00000 0.95065

C 0.60150 0.00000 0.11095

H -1.67890 0.00000 2.70271

H 0.37436 0.00000 4.08789

H 2.58999 0.00000 2.94406

C 3.08389 0.00000 0.41020

C 0.83552 0.00000 -1.29996

C 2.17736 0.00000 -1.79472

C 3.28429 0.00000 -0.96701

H 3.93216 0.00000 1.08841

H 4.28471 0.00000 -1.38606

H 2.31847 0.00000 -2.87196

S -0.31435 0.00000 -2.60372

Se -2.36144 0.00000 0.06328

H -1.44859 0.00000 -1.80420

**SSe*cc***

C -0.86437 -0.02629 1.09092

C -1.07342 -0.14672 2.44616

C 0.05102 -0.26455 3.30357

C 1.33629 -0.24935 2.80807

C 1.57194 -0.12895 1.41193

C 0.44124 -0.02807 0.54755

H -2.07406 -0.14657 2.86700

H -0.11913 -0.36337 4.37074

H 2.18494 -0.33368 3.48002

C 2.86454 -0.09985 0.82081

C 0.66946 0.06374 -0.84155

C 1.91880 0.10641 -1.41171

C 3.03520 0.02157 -0.54364

H 3.73369 -0.16991 1.46846

H 4.03256 0.05103 -0.96957

H 2.06498 0.19283 -2.48368

Se -0.96618 0.06393 -1.87232

S -2.22691 0.28384 -0.05464

H -1.04650 -1.43307 -1.99271

**STe**

C -0.25238 0.00000 0.99755

C -0.32171 0.00000 2.37756

C 0.86532 0.00000 3.14590

C 2.09636 0.00000 2.53174

C 2.20683 0.00000 1.11479

C 1.00651 0.00000 0.32425

H -1.28000 0.00000 2.89003

H 0.79444 0.00000 4.23023

H 3.00816 0.00000 3.12332

C 3.46741 0.00000 0.46256

C 1.12699 0.00000 -1.09882

C 2.37449 0.00000 -1.70072

C 3.54424 0.00000 -0.91203

H 4.36938 0.00000 1.06878

H 4.51216 0.00000 -1.40568

H 2.45551 0.00000 -2.78358

S -0.31273 0.00000 -2.16458

Te -2.02962 0.00000 -0.30667

**STe*o***

C -0.32793 0.04697 0.98473

C -0.43186 0.11013 2.37375

C 0.72974 0.13380 3.15021

C 1.99973 0.09553 2.56552

C 2.14933 0.03229 1.18253

C 0.96356 0.00662 0.35607

H -1.39898 0.14135 2.86588

H 0.64070 0.18305 4.23147

H 2.88380 0.11525 3.19511

C 3.46209 -0.00771 0.56540

C 1.09957 -0.05701 -1.04210

C 2.45033 -0.09937 -1.70839

C 3.61386 -0.06838 -0.76696

H 4.32693 0.01331 1.22176

H 4.60115 -0.09771 -1.21826

H 2.53018 0.73869 -2.41892

S -0.25360 -0.09116 -2.09755

Te -2.04405 0.00397 -0.34499

H 2.51385 -0.99879 -2.34134

**STe*o’***

C -0.67807 0.07150 1.42676

C -0.80510 0.13467 2.81734

C 0.34112 0.15604 3.60825

C 1.62491 0.11561 3.04482

C 1.79764 0.05230 1.66907

C 0.62532 0.02838 0.81249

H -1.78722 0.16701 3.27735

H 0.23397 0.20539 4.68773

H 2.49702 0.13397 3.69097

C 3.11822 0.00977 1.07079

C 0.78189 -0.03545 -0.57605

C 2.14137 -0.08085 -1.21883

C 3.29216 -0.05172 -0.25925

H 3.97322 0.02923 1.74009

H 4.28712 -0.08345 -0.69338

H 2.24313 0.75666 -1.92782

Te -1.01493 -0.06499 -1.74575

S -2.14562 0.04686 0.46762

H 2.22231 -0.98064 -1.84997

**STe*m***

C -0.31074 0.02175 0.96482

C -0.41766 0.03727 2.36033

C 0.71411 -0.00860 3.20200

C 1.97294 -0.07090 2.65594

C 2.13621 -0.08928 1.23365

C 0.96615 -0.04177 0.36364

H -1.39755 0.08606 2.82787

H 0.57728 0.00592 4.27830

H 2.85755 -0.10698 3.28414

C 3.39653 -0.15212 0.67243

C 1.13486 -0.06049 -1.07537

C 2.38889 -0.12300 -1.62157

C 3.59946 -0.17229 -0.77743

H 4.27325 -0.18795 1.31482

H 4.21114 -1.06008 -1.03439

H 2.52563 -0.13780 -2.69834

S -0.25976 -0.00376 -2.17247

Te -2.05124 0.09163 -0.38533

H 4.28878 0.65294 -1.04643

**STe*m’***

C -0.66005 0.03991 1.41105

C -0.78705 0.05501 2.81067

C 0.32646 0.00831 3.67064

C 1.59613 -0.05477 3.14677

C 1.77700 -0.07263 1.72731

C 0.62627 -0.02440 0.83179

H -1.78175 0.10464 3.24495

H 0.16845 0.02273 4.74385

H 2.47060 -0.09167 3.78898

C 3.04467 -0.13609 1.18613

C 0.82186 -0.04261 -0.60295

C 2.07959 -0.10503 -1.12779

C 3.28094 -0.15670 -0.26085

H 3.90912 -0.17276 1.84552

H 3.89609 -1.04674 -0.50019

H 2.25354 -0.11944 -2.19962

Te -1.02172 0.03682 -1.81580

S -2.15003 0.10348 0.45329

H 3.97881 0.66706 -0.51094

**STe*p***

C -0.33747 -0.01574 0.97239

C -0.46420 -0.05781 2.36178

C 0.68042 -0.15075 3.15260

C 1.95524 -0.20291 2.57657

C 2.11560 -0.16290 1.19809

C 0.95570 -0.06717 0.36847

H -1.43843 -0.01941 2.83956

H 0.57894 -0.18317 4.23324

H 2.82986 -0.27547 3.21684

C 3.48993 -0.21983 0.58157

C 1.11458 -0.02533 -1.05031

C 2.41458 -0.07725 -1.66675

C 3.52738 -0.16827 -0.90351

H 4.01254 -1.13168 0.91517

H 4.50322 -0.20688 -1.38038

H 2.48367 -0.04188 -2.74923

S -0.22847 0.08901 -2.11446

Te -2.04110 0.12929 -0.38014

H 4.11259 0.59926 0.97807

**STe*p’***

C -0.69556 -0.00516 1.41060

C -0.84690 -0.03632 2.80105

C 0.28314 -0.11260 3.60730

C 1.57221 -0.15905 3.05385

C 1.75578 -0.13006 1.68209

C 0.60892 -0.05138 0.82438

H -1.83592 -0.00115 3.24614

H 0.16323 -0.13654 4.68614

H 2.43492 -0.21847 3.71142

C 3.13962 -0.18024 1.08420

C 0.78804 -0.02160 -0.58531

C 2.09420 -0.06789 -1.18141

C 3.19898 -0.14209 -0.40085

H 3.66771 -1.08383 1.43204

H 4.18269 -0.17641 -0.86204

H 2.19678 -0.04319 -2.26216

Te -0.98925 0.09570 -1.77020

S -2.15691 0.09213 0.42770

H 3.75148 0.64757 1.48001

**STe*hb***

C -0.29628 0.08607 0.98319

C -0.43477 0.13876 2.35515

C 0.71338 0.19517 3.18290

C 1.97368 0.17816 2.63240

C 2.15167 0.12724 1.22381

C 0.99226 0.10395 0.37845

H -1.41405 0.13281 2.82556

H 0.58445 0.24169 4.25948

H 2.85328 0.20301 3.26870

C 3.44173 0.09095 0.62848

C 1.22194 0.08650 -1.02391

C 2.47817 0.02891 -1.58969

C 3.60617 0.02955 -0.73775

H 4.31090 0.10231 1.28006

H 4.59859 -0.01359 -1.17375

H 2.60989 -0.00617 -2.66670

S -0.19908 0.21508 -2.14782

Te -2.02231 -0.23198 -0.37267

H -0.28516 1.56978 -2.24750

**STe*cc***

C -0.66839 -0.00567 1.41348

C -0.85880 0.09093 2.77642

C 0.26368 0.16936 3.63556

C 1.54204 0.14547 3.12682

C 1.76456 0.05600 1.72650

C 0.63358 -0.00509 0.84719

H -1.85894 0.09824 3.19887

H 0.09997 0.24605 4.70553

H 2.40033 0.20231 3.78966

C 3.06849 0.02799 1.16385

C 0.88715 -0.06087 -0.55269

C 2.16365 -0.10202 -1.07966

C 3.26784 -0.05574 -0.19799

H 3.92196 0.06989 1.83460

H 4.27267 -0.08300 -0.60651

H 2.34103 -0.16203 -2.14935

Te -0.93390 0.00854 -1.76842

S -2.12588 -0.26030 0.36913

H -0.98268 1.78715 -1.87784

**SeTe**

C -0.18155 0.00000 1.25235

C -0.24568 0.00000 2.63330

C 0.93909 0.00000 3.40302

C 2.16853 0.00000 2.78685

C 2.27567 0.00000 1.37010

C 1.07614 0.00000 0.57447

H -1.20420 0.00000 3.14594

H 0.86848 0.00000 4.48734

H 3.08198 0.00000 3.37584

C 3.54075 0.00000 0.72590

C 1.21294 0.00000 -0.84649

C 2.46240 0.00000 -1.43931

C 3.62968 0.00000 -0.64699

H 4.43752 0.00000 1.33980

H 4.60055 0.00000 -1.13470

H 2.55207 0.00000 -2.52164

Se -0.31842 0.00000 -2.01559

Te -2.01496 0.00000 0.01843

**SeTe*o***

C -0.26401 0.05736 1.23083

C -0.36193 0.12010 2.62105

C 0.79782 0.14275 3.39829

C 2.06568 0.10370 2.81009

C 2.21238 0.04077 1.42754

C 1.02628 0.01581 0.59438

H -1.32855 0.15192 3.11448

H 0.70972 0.19168 4.47961

H 2.95164 0.12255 3.43715

C 3.52906 0.00044 0.81957

C 1.17774 -0.04777 -0.79965

C 2.53209 -0.09127 -1.45596

C 3.69172 -0.06054 -0.51097

H 4.38840 0.02144 1.48321

H 4.68156 -0.09034 -0.95649

H 2.62074 0.74572 -2.16702

Se -0.27060 -0.08420 -1.95922

Te -2.03590 0.01966 -0.02885

H 2.60288 -0.99081 -2.08833

**SeTe*o’***

C -0.41232 0.06761 1.41597

C -0.52855 0.13061 2.80495

C 0.62048 0.15227 3.59307

C 1.89706 0.11188 3.01873

C 2.05943 0.04878 1.64058

C 0.88264 0.02470 0.78741

H -1.50650 0.16283 3.27413

H 0.51935 0.20146 4.67309

H 2.77554 0.12992 3.65622

C 3.38178 0.00679 1.04666

C 1.04619 -0.03883 -0.60300

C 2.41059 -0.08260 -1.24024

C 3.56056 -0.05411 -0.28201

H 4.23352 0.02636 1.72007

H 4.55635 -0.08514 -0.71425

H 2.51464 0.75569 -1.94806

Te -0.70586 -0.07346 -1.84169

Se -2.01147 0.04140 0.40842

H 2.49453 -0.98136 -1.87251

**SeTe*m***

C -0.24608 0.02023 1.21957

C -0.34689 0.03497 2.61727

C 0.78261 -0.01117 3.45969

C 2.03987 -0.07326 2.91066

C 2.19922 -0.09098 1.48818

C 1.02920 -0.04325 0.61377

H -1.32638 0.08363 3.08612

H 0.64639 0.00289 4.53606

H 2.92641 -0.10973 3.53617

C 3.46282 -0.15337 0.93494

C 1.21404 -0.06213 -0.82310

C 2.46905 -0.12408 -1.36036

C 3.67766 -0.17405 -0.51269

H 4.33417 -0.18888 1.58459

H 4.28825 -1.06360 -0.76568

H 2.61526 -0.13858 -2.43615

Se -0.27182 -0.00196 -2.02748

Te -2.04423 0.09409 -0.05992

H 4.36862 0.65046 -0.77867

**SeTe*m’***

C -0.39561 0.02816 1.40614

C -0.51238 0.04315 2.80437

C 0.60449 -0.00326 3.65992

C 1.86888 -0.06618 3.12561

C 2.04081 -0.08395 1.70497

C 0.88377 -0.03585 0.81325

H -1.50300 0.09267 3.24818

H 0.45326 0.01124 4.73409

H 2.74861 -0.10301 3.76054

C 3.30944 -0.14718 1.16572

C 1.08352 -0.05513 -0.62269

C 2.34397 -0.11751 -1.14335

C 3.54621 -0.16755 -0.27974

H 4.17247 -0.18322 1.82678

H 4.16209 -1.05641 -0.52149

H 2.51839 -0.13293 -2.21541

Te -0.70982 0.02011 -1.91346

Se -2.01531 0.09704 0.39394

H 4.24065 0.65838 -0.53190

**SeTe*p***

C -0.27659 -0.02465 1.22127

C -0.39767 -0.06313 2.61191

C 0.74596 -0.15093 3.40325

C 2.01849 -0.20142 2.82340

C 2.17530 -0.16535 1.44494

C 1.01500 -0.07515 0.61002

H -1.37124 -0.02566 3.09140

H 0.64594 -0.18039 4.48410

H 2.89561 -0.26981 3.46084

C 3.55438 -0.22072 0.83796

C 1.18902 -0.03869 -0.80494

C 2.49072 -0.09002 -1.41145

C 3.60273 -0.17561 -0.64570

H 4.07761 -1.12910 1.18026

H 4.58038 -0.21388 -1.11874

H 2.56927 -0.05924 -2.49372

Se -0.24512 0.07748 -1.97463

Te -2.03728 0.11299 -0.06243

H 4.17139 0.60222 1.23571

**SeTe*p’***

C -0.42932 -0.02020 1.40496

C -0.57017 -0.05475 2.79391

C 0.56262 -0.13786 3.59674

C 1.84447 -0.18760 3.03217

C 2.01793 -0.15518 1.65806

C 0.86713 -0.06953 0.80440

H -1.55505 -0.01711 3.24820

H 0.44874 -0.16436 4.67614

H 2.71329 -0.25252 3.68121

C 3.40341 -0.20957 1.06451

C 1.05287 -0.03642 -0.60706

C 2.36211 -0.08665 -1.19743

C 3.46719 -0.16785 -0.41899

H 3.92553 -1.11627 1.41335

H 4.45084 -0.20512 -0.87993

H 2.46637 -0.05924 -2.27829

Te -0.67799 0.09147 -1.86090

Se -2.01999 0.09403 0.37213

H 4.01615 0.61484 1.46607

**SeTe*hb***

C -0.24214 0.06589 1.24015

C -0.37886 0.12968 2.61226

C 0.76669 0.18821 3.44216

C 2.02601 0.16765 2.89109

C 2.20372 0.10792 1.48299

C 1.04534 0.07450 0.63234

H -1.35870 0.13189 3.08208

H 0.63701 0.24183 4.51831

H 2.90652 0.19907 3.52589

C 3.49800 0.07773 0.89729

C 1.28915 0.04996 -0.76699

C 2.54922 0.00149 -1.32260

C 3.67378 0.01480 -0.46671

H 4.36142 0.09795 1.55617

H 4.66884 -0.01994 -0.89740

H 2.69136 -0.03594 -2.39820

Se -0.21300 0.13851 -2.00190

Te -2.01849 -0.23500 -0.05921

H -0.28881 1.62839 -2.09566

**SeTe*cc***

C -0.40394 0.01737 1.42026

C -0.58091 0.10643 2.78425

C 0.54630 0.18582 3.63644

C 1.81790 0.17219 3.11275

C 2.02695 0.09160 1.70992

C 0.88925 0.02877 0.83534

H -1.57623 0.10750 3.21846

H 0.39196 0.25507 4.70829

H 2.68367 0.22921 3.76578

C 3.33098 0.07198 1.14734

C 1.14529 -0.02192 -0.56505

C 2.42307 -0.05550 -1.09058

C 3.53035 -0.00678 -0.21363

H 4.18323 0.11566 1.81951

H 4.53437 -0.02858 -0.62442

H 2.59955 -0.11212 -2.16086

Te -0.63050 0.04209 -1.85528

Se -1.99160 -0.23868 0.32555

H -0.66749 1.81982 -1.98322
